# Supplementary material for: Reciprocal antagonism of PIN1-APC/CCDH1 governs mitotic protein stability and cell cycle entry
Source: PubMed Central journal article supplement (PMC11018817; doi:10.1038/s41467-024-47427-w), 2024-04-15
Supplement: 41467_2024_47427_MOESM3_ESM.pdf [file 41467_2024_47427_MOESM3_ESM.pdf]

Supplementary Data 1.

The relationship between PIN1 protein expression and overall survival in a Breast Cancer Tissue Microarray (TMA)

Supplementary Data 2.

Full list of PIN1-interacting proteins identified by mass spectrometry

Supplementary Data 3.

CDH1 peptides identified by mass spectrometry

Supplementary Data 4.

16-Panel Markers for CyTOF

Supplementary Movie 1.

MCF7 cells expressing the APC/C-degron reporter were treated with DMSO and followed for 4 days

Supplementary Movie 2.

MCF7 cells expressing the APC/C-degron reporter were treated with Palbociclib and followed for 4 days

Supplementary Movie 3.

MCF7 cells expressing the APC/C-degron reporter were treated with Sulfofin and followed for 4 days

Supplementary Movie 4.

MCF7 cells expressing the APC/C-degron reporter were treated with AApin and followed for 4 days
